# Supplementary material for: A monolithic nano-scale sensor architecture with tuneable gas diffusion for molecular fingerprinting
Source: Royal Society of Chemistry journal article supplement (doi:10.1039/d3ta07282g), 2024-01-01
Supplement: d3ta07282g1.pdf [file d3ta07282g1.pdf]

## A Monolithic Nano-Scale Sensor Architecture with Tuneable Gas Diffusion for Molecular Fingerprinting

Alishba T. John<sup>a</sup>, Mahdiar Taheri<sup>b</sup>, Jodie A. Yuwono<sup>c</sup>, Priyank Kumar<sup>d</sup>, David R. Nisbet<sup>e,f,g,h</sup>, Krishnan Murugappan<sup>a,i,\*</sup>, Antonio Tricoli<sup>a,j\*</sup>

<sup>a</sup> Nanotechnology Research Laboratory, Research School of Chemistry, College of Science, The Australian National University, Canberra 2601, Australia

<sup>b</sup> School of Engineering, The Australian National University, Canberra 2601, Australia

<sup>c</sup> School of Chemical Engineering, The University of Adelaide, SA 5005, Australia

<sup>d</sup> School of Chemical Engineering, University of New South Wales, NSW 2052, Australia

<sup>e</sup> Laboratory of Advanced Biomaterials, Research School of Chemistry and the John Curtin School of Medical Research, The Australian National University, Canberra 2601, Australia

<sup>f</sup> The Graeme Clark Institute, The University of Melbourne, Melbourne, Australia

<sup>g</sup> Department of Biomedical Engineering, Faculty of Engineering and Information Technology, The University of Melbourne, Melbourne Australia

<sup>h</sup> Melbourne Medical School, Faculty of Medicine, Dentistry and Health Science, The University of Melbourne, Melbourne Australia

<sup>i</sup> Commonwealth Scientific and Industrial Research Organization (CSIRO), Mineral Resources, Private Bag 10, Clayton South, Victoria 3169, Australia

<sup>j</sup> Nanotechnology Research Laboratory, School of Biomedical Engineering, Faculty of Engineering, The University of Sydney, Camperdown 2006, Australia

Correspondence: krishnan.murugappan@csiro.au; antonio.tricoli@anu.edu.au

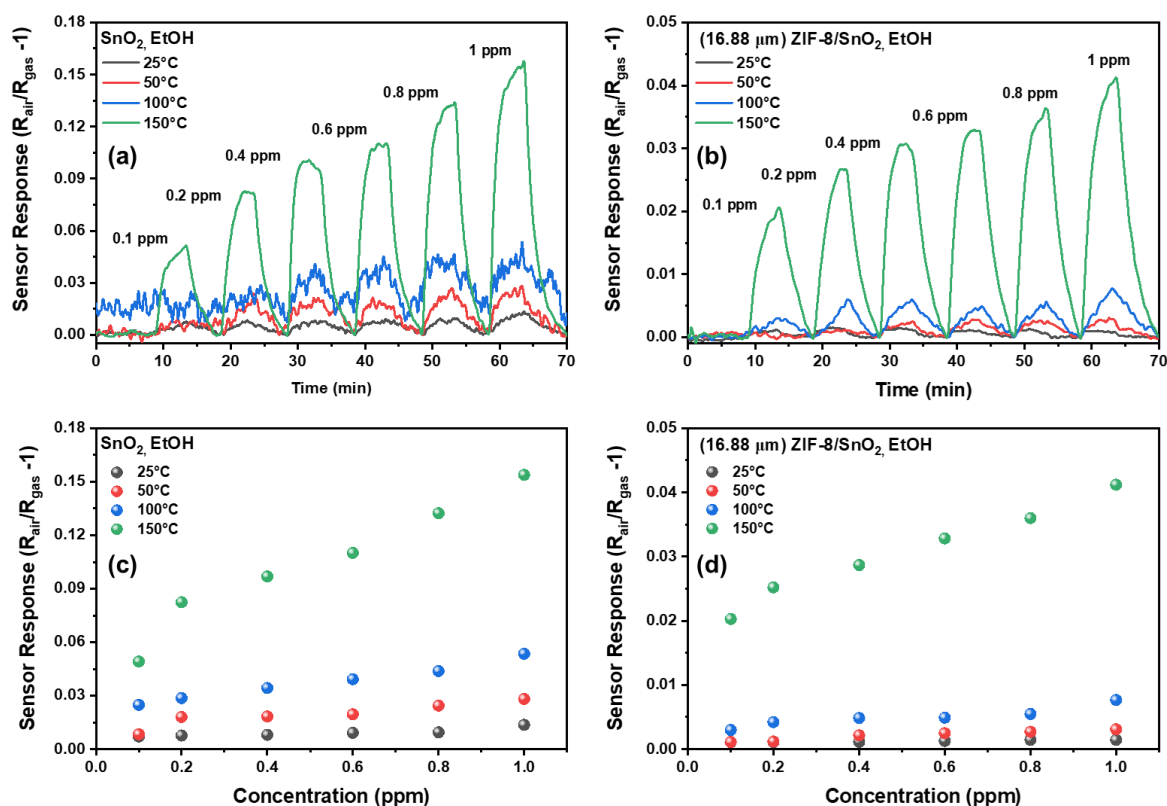

**Fig. S1** (a) Dynamic gas sensing response of SnO<sub>2</sub> against ethanol concentrations (0.1 – 1 ppm) at various temperatures: 25 °C, 50 °C, 100 °C, 150 °C. (b) (a) Dynamic gas sensing response of (16.88 μm) ZIF-8/SnO<sub>2</sub> against ethanol concentrations (0.1 – 1 ppm) at various temperatures:

25 °C, 50 °C, 100 °C, 150 °C. (c) Linear responsivity plot of SnO<sub>2</sub> for ethanol concentrations (0.1 – 1 ppm) at various temperatures: 25 °C, 50 °C, 100 °C, 150 °C. (d) Linear responsivity plot of (16.88 μm) ZIF-8/SnO<sub>2</sub> for ethanol concentrations (0.1 – 1 ppm) at various temperatures: 25 °C, 50 °C, 100 °C, 150 °C.

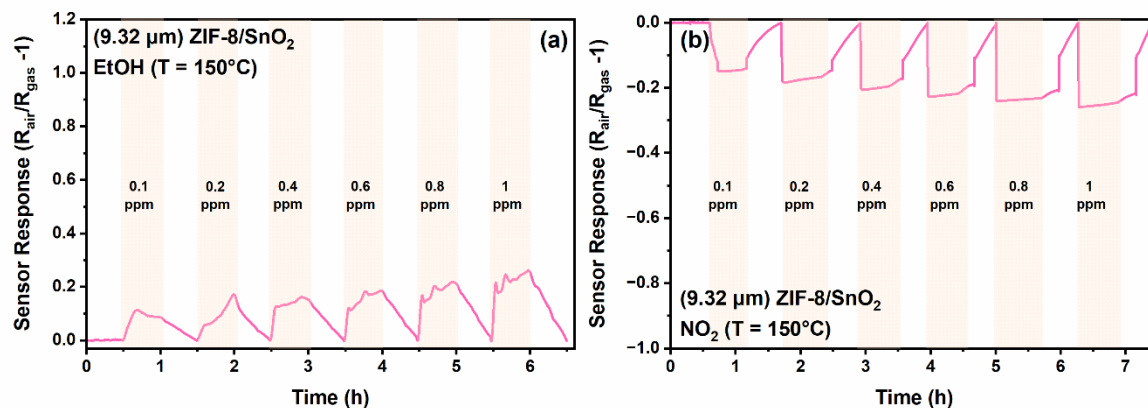

**Fig. S2.** Dynamic sensing response of (9.32 μm) ZIF-8/SnO<sub>2</sub> towards (a) Ethanol (EtOH) and (b) NO<sub>2</sub> in the concentration range of 0.1 - 1 ppm at 150 °C

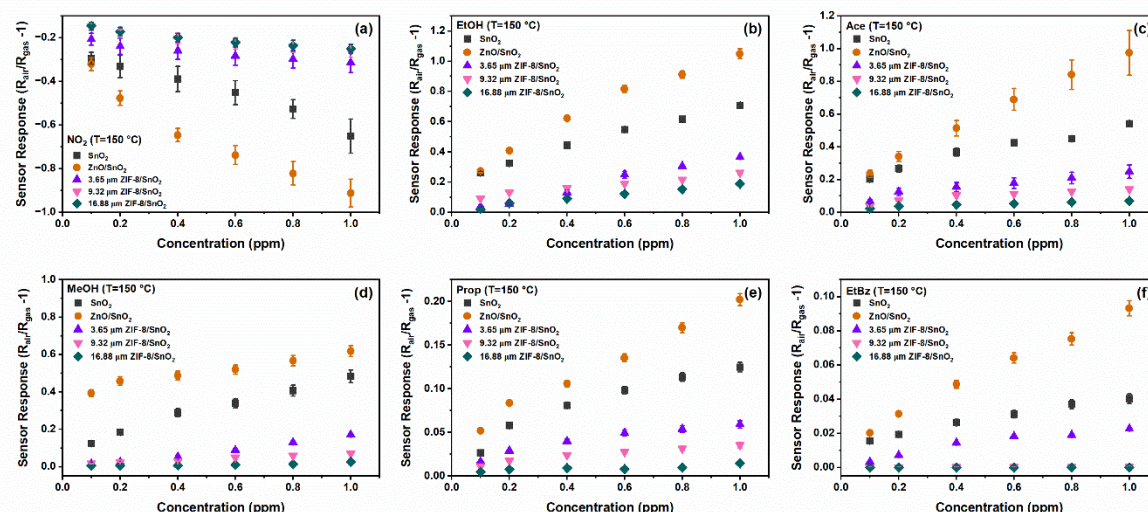

**Fig. S3** Linear responsivity of SnO<sub>2</sub> (grey, square), ZnO/SnO<sub>2</sub> (brown, circles), (3.65 μm) ZIF-8/SnO<sub>2</sub> (purple, upward triangle), (9.32 μm) ZIF-8/SnO<sub>2</sub> (pink, downward triangle) and (16.88 μm) ZIF-8/SnO<sub>2</sub> (green, diamonds) from 0.1 – 1 ppm at 150 °C towards (a) NO<sub>2</sub>, (b) Ethanol (EtOH), (c) Acetone (Ace), (d) Methanol (MeOH), (e) Propane (Prop) and (d) Ethyl Benzene (EtBz)

**Table S1:** Adsorption energies (eV) of various target molecules on ZIF-8 and SnO<sub>2</sub> (110)

|                  | NO <sub>2</sub> | Ethanol | Acetone | Methanol | Propane | Ethyl Benzene |
|------------------|-----------------|---------|---------|----------|---------|---------------|
| ZIF-8            | -0.38           | -0.36   | -0.33   | -0.35    | -0.39   | -0.15         |
| SnO <sub>2</sub> | -2.00           | -0.69   | -0.52   | -0.66    | -0.24   | -0.47         |

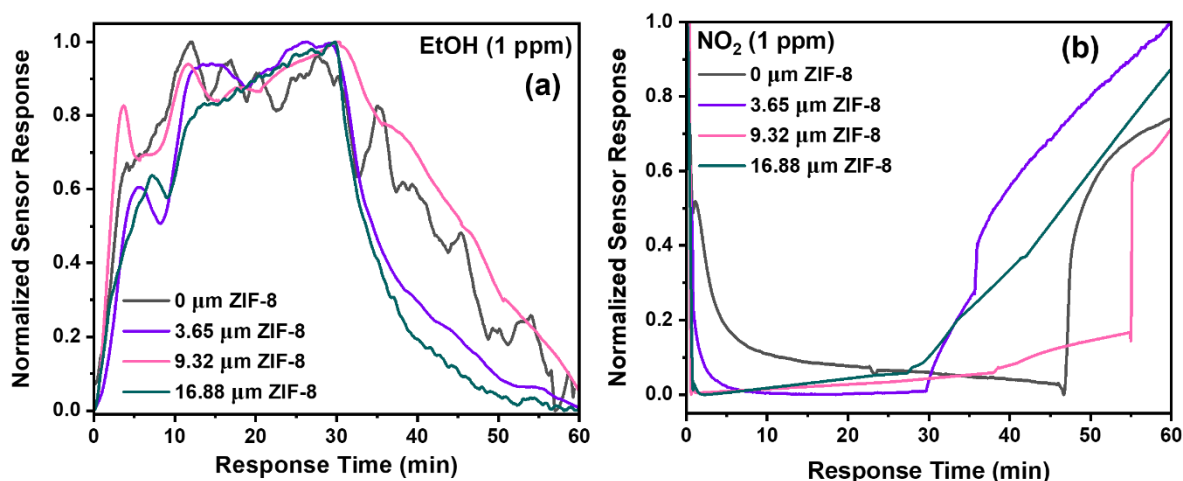

**Fig. S4** Response-recovery curves of SnO<sub>2</sub> (grey), 3.65 μm ZIF-8/SnO<sub>2</sub> (purple), 9.32 μm ZIF-8/SnO<sub>2</sub> (pink) and 16.88 μm ZIF-8/SnO<sub>2</sub> (green) towards 1 ppm of (a) Ethanol (EtOH) and (b) NO<sub>2</sub> at 150 °C.

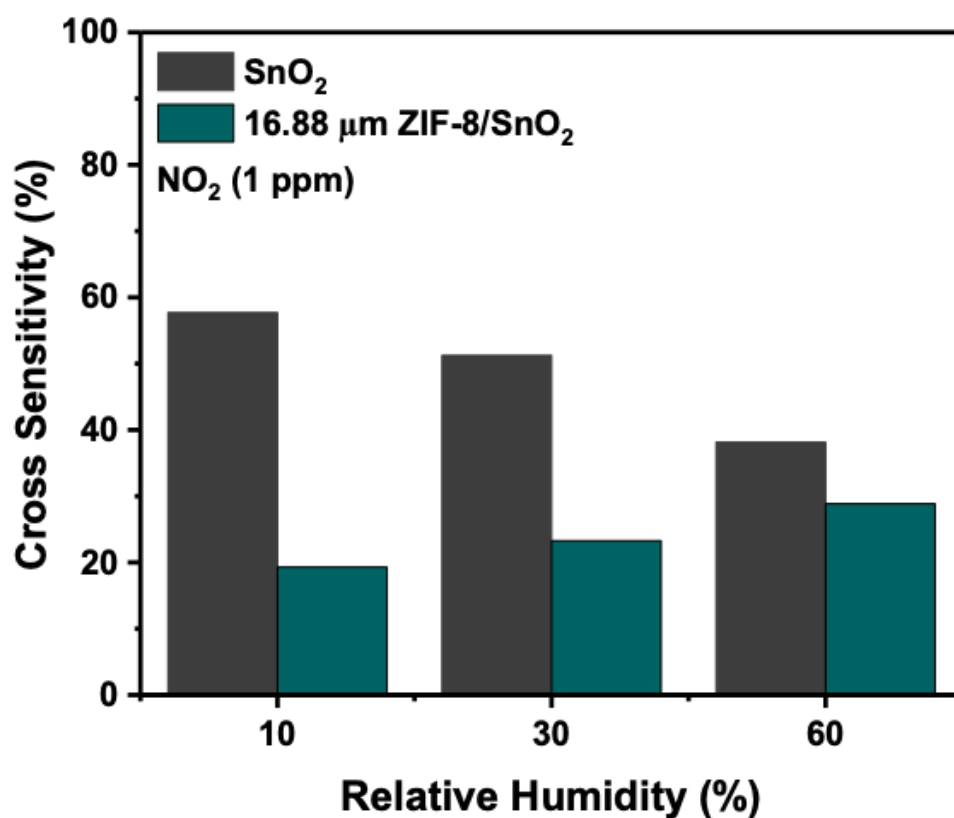

**Fig. S5** Cross-sensitivity to humidity (at 20 °C) at 1 ppm NO<sub>2</sub>. All measurements were performed at 150 °C.
